# Supplementary material for: Antisense Oligonucleotide Induction of the hnRNPA1b Isoform Affects Pre-mRNA Splicing of SMN2 in SMA Type I Fibroblasts
Source: MDPI journal article supplement (doi:10.3390/ijms23073937), 2022-04-01
Supplement: s1 [file s1]

**Supplementary Table S1: List of AO and PMO Sequences used for this study.**

| AO/ PMO Number                       | Annealing Coordinates   | Sequence 5' → 3'                   | Length (bp) |
|--------------------------------------|-------------------------|------------------------------------|-------------|
| 1                                    | hnRNPA1 E7A (+109+133)  | CCG CCT CCG TTG TTA TAG CTG TCA T  | 25          |
| 2                                    | hnRNPA1 E7A (+121+145)  | CCA AAG CCG CCT CCG CCT CCG TTG T  | 25          |
| 3                                    | hnRNPA1 E7BD (-401-420) | ATT CAG TTG AAT AAT CCA GT         | 20          |
| 4                                    | hnRNPA1 E7BD (-421-440) | TTT CAT TCT CTG GGA AAG GC         | 20          |
| 5                                    | hnRNPA1 E7BD (-411-430) | TGG GAA AGG CAT TCA GTT GA         | 20          |
| 6                                    | hnRNPA1 E7BD (-120-144) | AAG CTA GGA GGA GGT AGC ATA GCA A  | 25          |
| 7                                    | hnRNPA1 E7BD (-145-166) | GGA GTG AGG CGG CCC CAG CTT A      | 22          |
| 8                                    | hnRNPA1 E7BD (-35-59)   | AAG CTC TAA AAG GCT AAT CTA GCT G  | 25          |
| 9                                    | hnRNPA1 E7D (-43-62)    | TAA CCT ATT CTA AAG ATC CA         | 20          |
| 10                                   | hnRNPA1 E7BD (-167-192) | ACT ATC CAC TTA TCT CTA CTA TTT G  | 25          |
| Sham AO                              | HBS 1LE6A (+114+139)    | TTC TGA TGC TTG AAT CGT GTG GGG TG | 26          |
| Anti-ISS-N1                          | hSMNE7D (-10-29)        | AUU CAC UUU CAU AAU GCU GG         | 20          |
| PMO Standard Control from Gene Tools |                         | CCTCCTACCTCAGTTACAATTTATA          | 25          |

**Supplementary Table S2: Primers for the RT-PCR analysis used in this study.**

| Primer          | Sequence (5'--3')           | Reference            |
|-----------------|-----------------------------|----------------------|
| SMN F           | AGGTCTCCTGGAAATAAATCAG      | Flynn, LP. 2018      |
| SMN R           | TGGTGTCAATTTAGTGCTGCTCT     | Flynn, LP. 2018      |
| hnRNPA1 F       | GAGCTGTCTCCAGAGAAGAT        | New design           |
| hnRNPA1 R       | CATGTCTTCTTTGTAGCAGCT       | New design           |
| hnRNPA2/B1E1F   | AAATCGGGCTGAAGCGACTGA       | Heartfield, JT. 2002 |
| hnRNPA2/B1E3/4R | CCTCATTACCACACAGTCTGTA      | New design           |
| A2B1_3'UTR_A    | TTTCAACAGCTGAGGCAAGC        | Bonomi, S. 2013      |
| A2B1_3'UTR_B    | AGTTACCTGCAGCAAGACACC       | Bonomi, S. 2013      |
| hENAHE10/11F    | CTTCAACAAGTACACCTGAACC      | New design           |
| hENAHE14/15R    | AGTTCCTGCCTGATTGCATCAA      | New design           |
| hRON2507F       | CCTGAATATGTGGTCCGAGACCCCCAG | Ghigna, C. 2005      |
| hRON2991R       | CTAGCTGCTTCCTCCGCCACCAGTA   | Ghigna, C. 2005      |
| FOXM1a F        | GTCTCCACAATTGCCCGAG         | Zhang, X. 2017       |
| FOXM1a R        | CCAAAATCTCGCAGATCGC         | Zhang, X. 2017       |
| FOXM1b F        | GGTGTTTAAGCAGCAGAAAC        | Zhang, X. 2017       |
| FOXM1b R        | GCAGCACCTTGGGGGCAATGC       | Zhang, X. 2017       |
| FOXM1c F        | CCACTGGACCCAGGGTCTCC        | Zhang, X. 2017       |
| FOXM1c R        | GCAGCACCTTGGGGGCAATGC       | Zhang, X. 2017       |
| FOXM1d F        | CAGGTGTTTAAGCAGCAGA         | Zhang, X. 2017       |
| FOXM1d R        | GGTGATGGGTGTACCAAAT         | Zhang, X. 2017       |
| MYBL2 F1        | GGAAGTCTTCTGACCAACTGGC      | Karni, R. 2007       |
| MYBL2 R1        | GCAGCATGTTTCTGGTGCAGGGG     | Karni, R. 2007       |
| MYBL2 F3        | AAAACAGTGAGGAGGAAC          | Ren, F. 2015         |
| MYBL2 R3        | CAGGGAGGTCAAATTTAC          | Ren, F. 2015         |
| hGAPDH F        | GCAGGGGGGAGCCAAAAGGG        | Päth, G. 1997        |
| hGAPDH R        | TGCCAGCCCCAGCGTCAAAG        | Päth, G. 1997        |
